# Supplementary material
Source: publisher figshare collection journal article supplement (https://tandf.figshare.com/ndownloader/files/35116158)
Supplement: Supplementary file 1 [file 35116158]

## SUPPLEMENTARY MATERIAL

### **A new ferulol derivative isolated from the aerial parts of *Ferulago nodosa* (L.) Boiss. growing in Sicily (Italy)**

Natale Badalamenti<sup>a</sup>, Alessandro Vaglica<sup>a</sup>, Antonella Maggio<sup>a,\*</sup>, and Maurizio Bruno<sup>a,b</sup>

<sup>a</sup> *Department of Biological, Chemical and Pharmaceutical Sciences and Technologies (STEBICEF), University of Palermo, Viale delle Scienze, Palermo, building 17, Italy.*

<sup>b</sup> *Centro Interdipartimentale di Ricerca “Riutilizzo bio-based degli scarti da matrici agroalimentari” (RIVIVE), Università di Palermo, Italy.*

## **A new ferulol derivative isolated from the aerial parts of *Ferulago nodosa* (L.) Boiss. growing in Sicily (Italy)**

*Ferulago nodosa* (L.) Boiss. (Apiaceae) is a species occurring in the Balkan-Tyrrhenian area being present in Crete, Greece, Albania, and probably in Macedonia. Although the western disjointed population of Sicily has been classified as an endemic sub-species, *Ferulago nodosa* subsp. *geniculata* (Guss.) Troia & Raimondo, it is not officially accepted. From the aerial parts of the Sicilian accession of this species four known metabolites (**1-4**), and a new ferulol derivative (**5**), were isolated and characterized. The structure of the new compounds was determined by mean of extensive NMR spectroscopic experiments.

**Keywords:** *Ferulago nodosa*; Apiaceae; NMR; ferulol derivatives

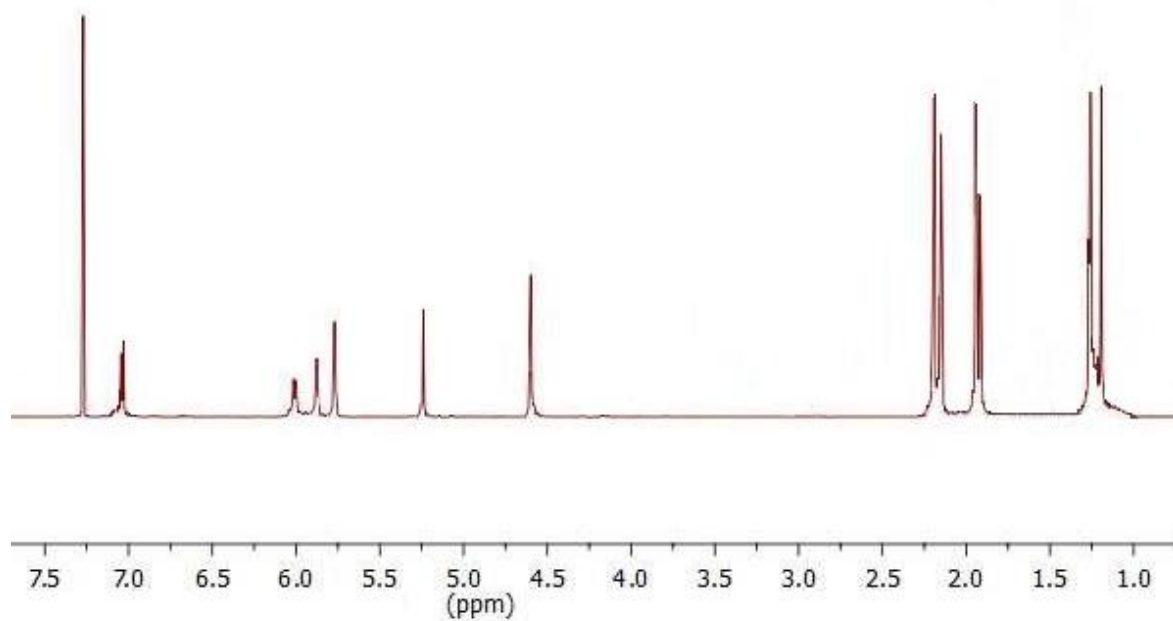

**Figure S1.**  $^1\text{H}$ -NMR spectrum of compound **5**

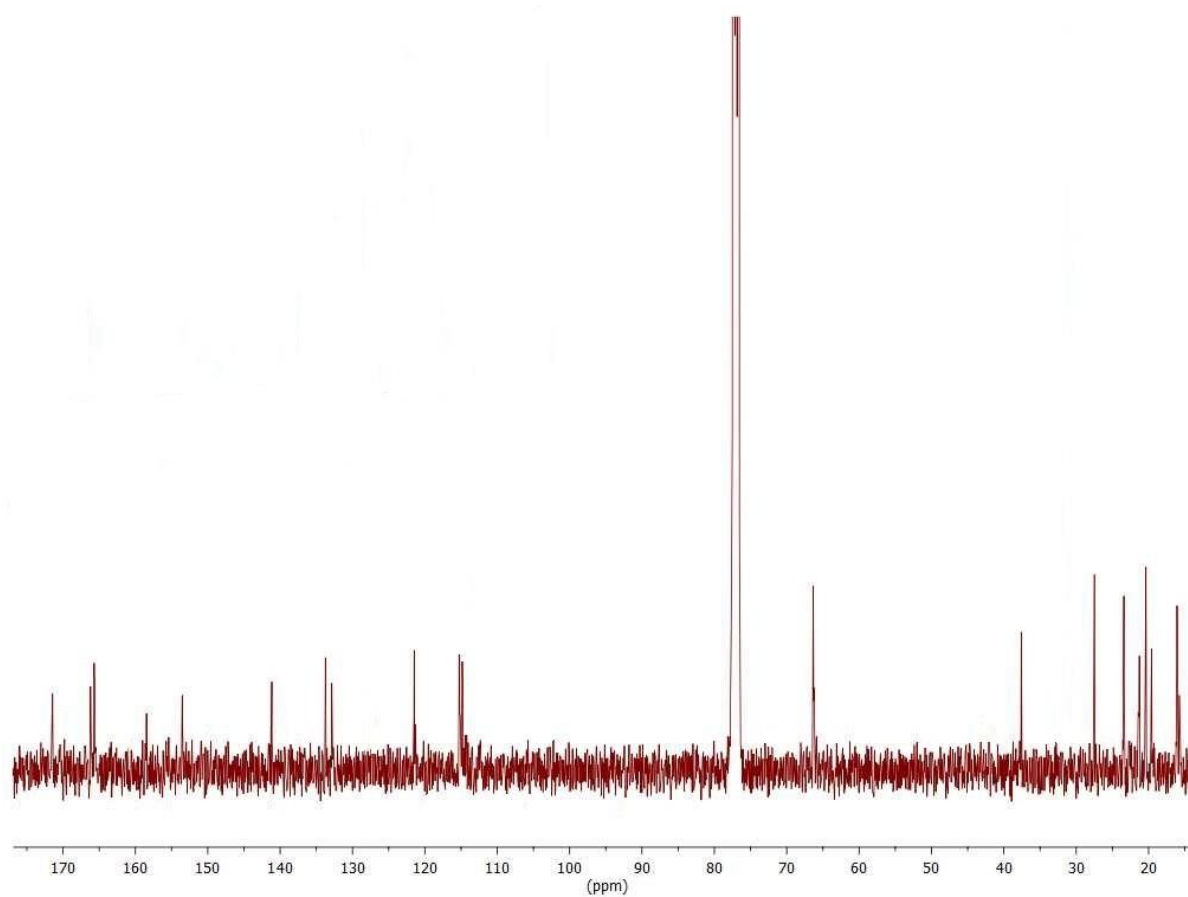

**Figure S2.**  $^{13}\text{C}$ -NMR spectrum of compound **5**

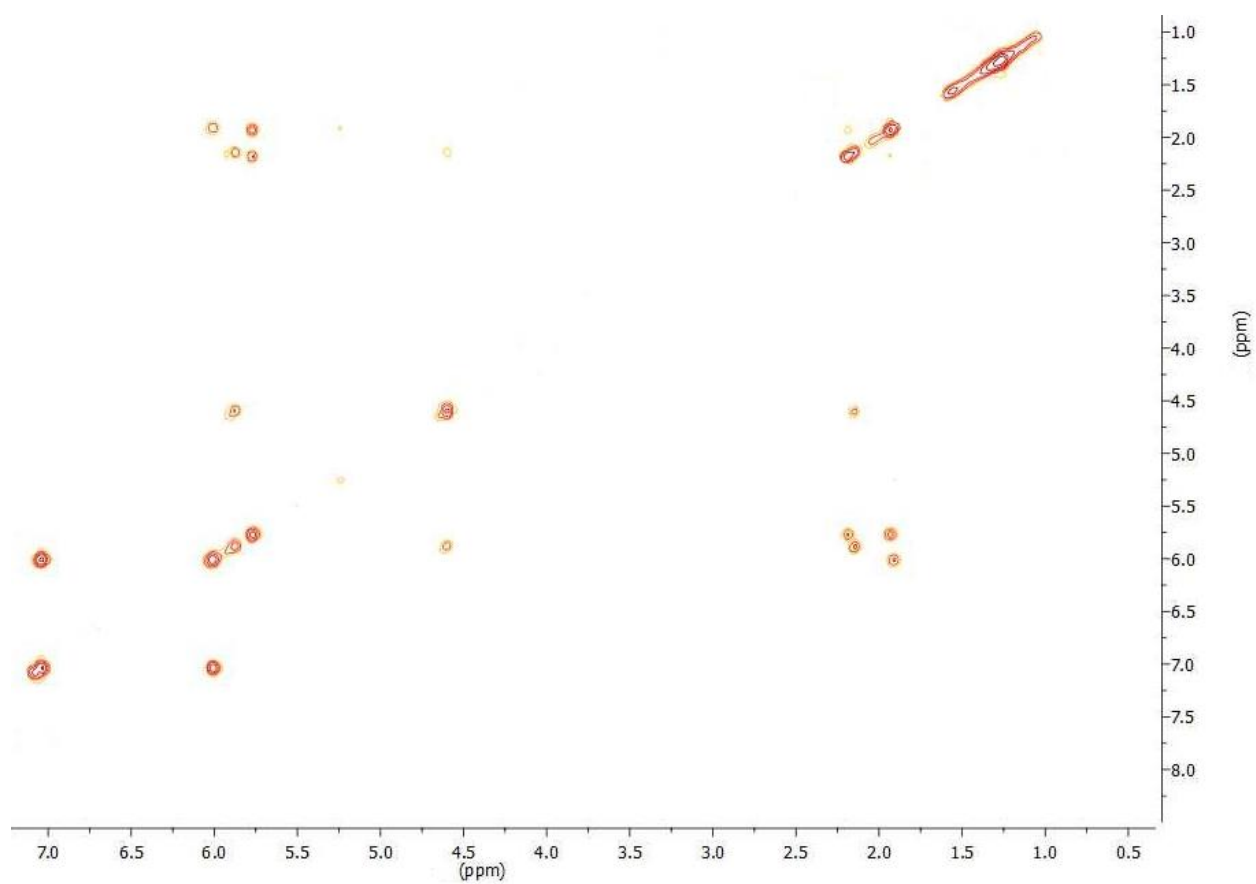

**Figure S3.** COSY spectrum of compound **5**

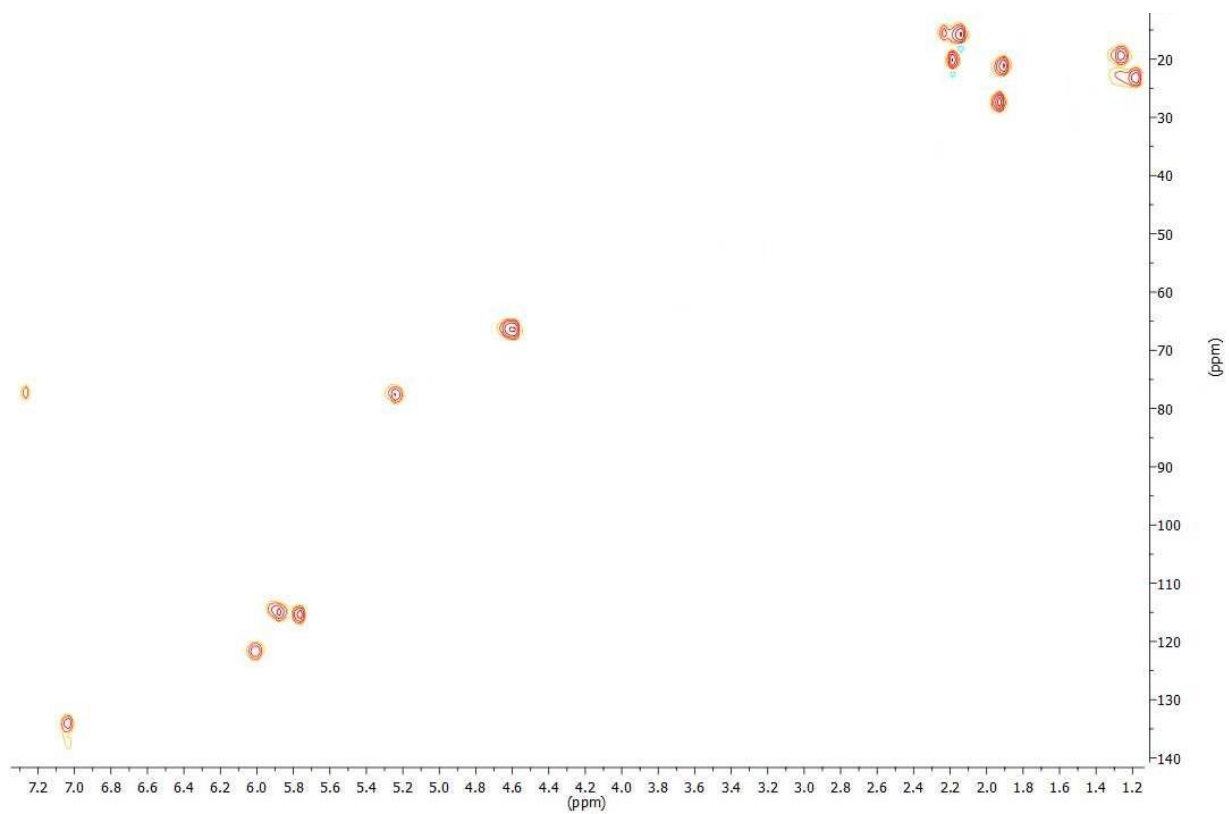

**Figure S4.** HSQC spectrum of compound **5**

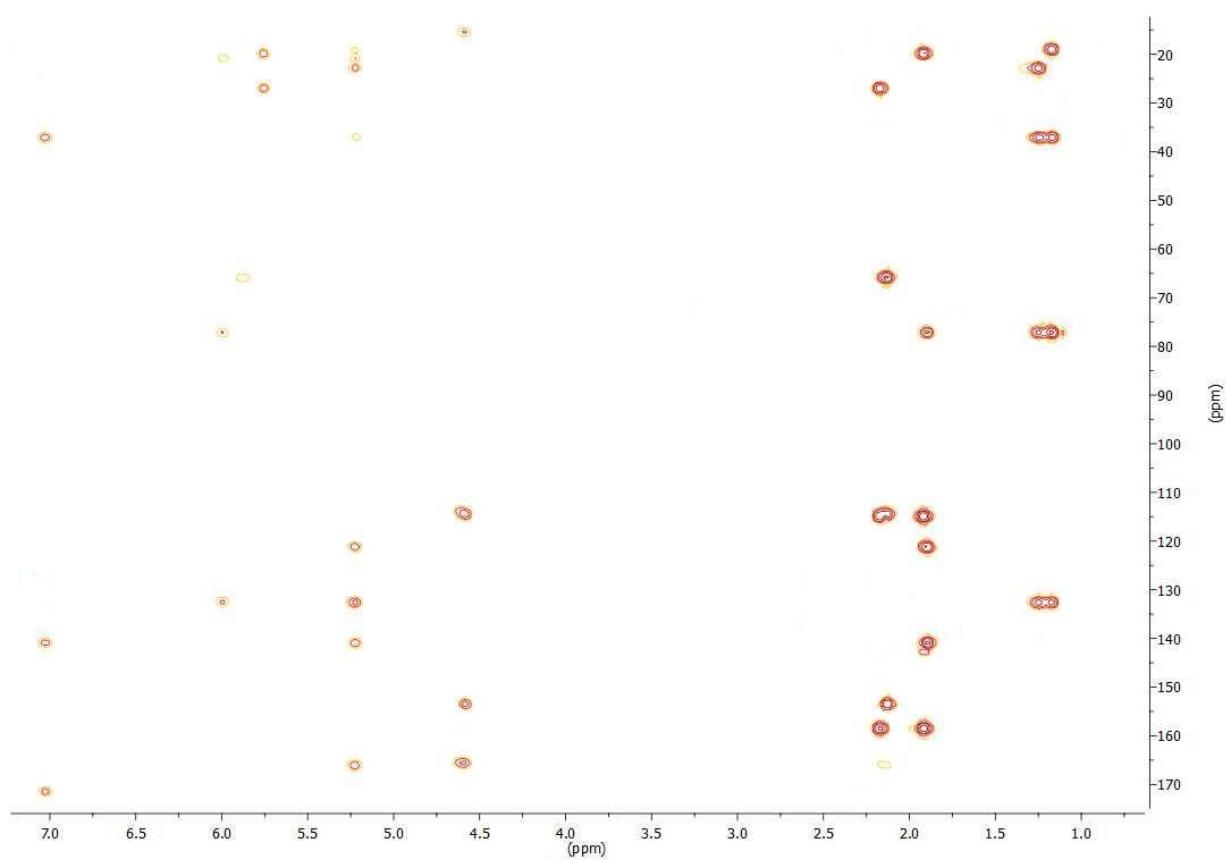

**Figure S5.** HMBC spectrum of compound **5**

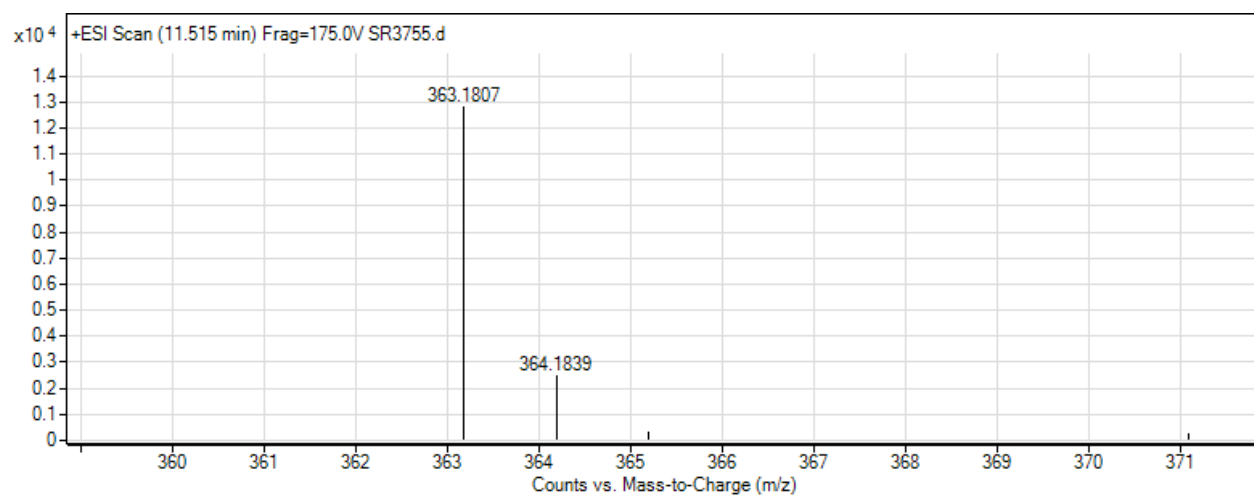

**Figure S6.** HPLC/ESI/Q-TOF HRMS spectrum of compound **5**
